# Supplementary material
Source: Springer Nature journal article supplement (https://www.springermedizin.de/resource/supplementary/12974_2010_355_MOESM2_ESM.pdf/9601516)

Relative IL-1RI levels  
(arbitrary units)

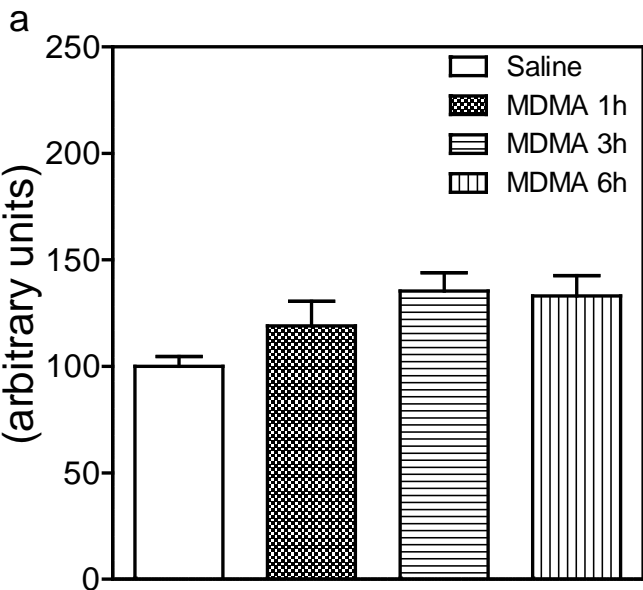

Relative IL-1RI levels  
(arbitrary units)

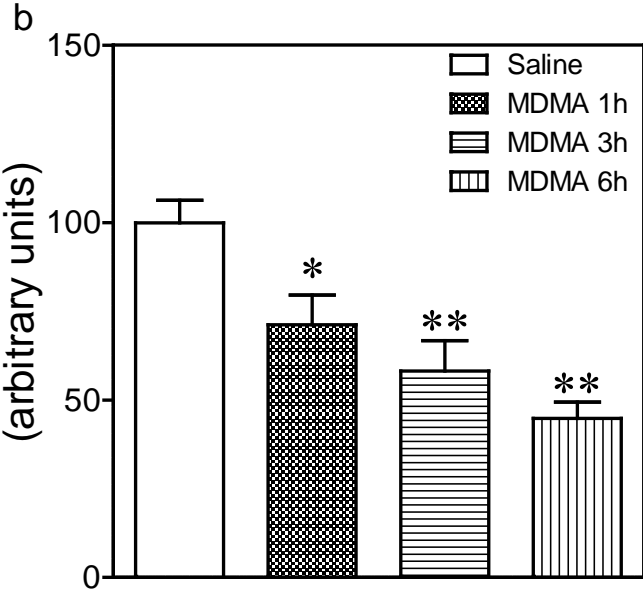

**c**

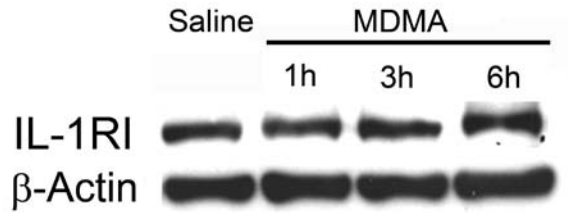

**d**

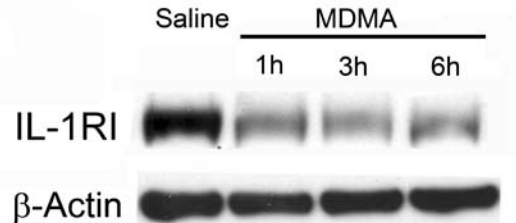

Supplement: MOESM2 [file 9601516]
